# Supplementary material
Source: PubMed Central journal article supplement (PMC3739951)

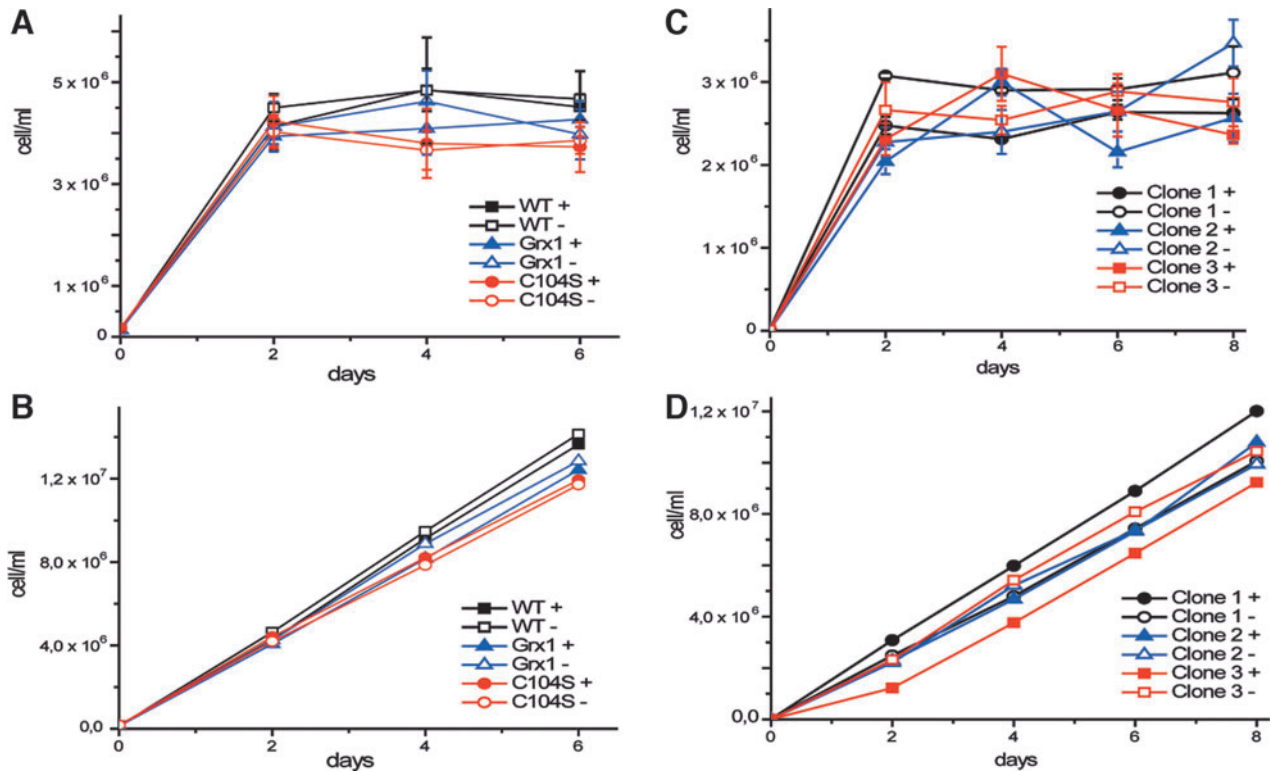

**SUPPLEMENTARY FIG. S5. Phenotypic analysis of infective trypanosomes overexpressing C104S *Tb1-C-Grx1*.** (A, B) Comparative growth of *T. brucei* parental WT strain and cell lines for inducible overexpression of WT (*Grx1*) and C104S mutant (C104S) of *Tb1-C-Grx1* (3) in the presence (+) and absence (-) of 10  $\mu\text{g}/\text{ml}$  oxytet. Cells were inoculated at  $10^5$  cells/ml in a culture medium containing or not oxytet, counted every 48 h, and diluted to the initial cell density with replenishment of inducer every 24 h. Cell growth (A) and cumulative cell density (B) are shown. (C, D) Growth curves of clones 1, 2, and 3 from cell line C104S. Cells were inoculated at  $10^4$  cells/ml in a culture medium with (+) or without (-) 10  $\mu\text{g}/\text{ml}$  oxytet, counted every 48 h, and seeded at the same density with replenishment of an inducer every 24 h. Cell growth (C) and the cumulative cell density (D) are shown. Error bars in panel (A) and (C) represent the standard deviations from the mean corresponding to four independent measurements. The error bars in (B) and (D) are omitted for better visualization. The differences in the growth rates between induced and noninduced trypanosomes were not statistically significant (two-tailed Student's *t*-test). (E) Representative Western blot showing the expression levels of the ectopic copy of C104S in the cell line used for the infection experiment (clone 3; Fig. 10A, B) under induced (10 days of continued induction with 10  $\mu\text{g}/\text{ml}$  oxytet; +oxy) and noninduced conditions (-). Total cell extracts from  $6 \times 10^6$  parasites were loaded per lane on an SDS-12% PAGE, and the blot was revealed as described in Figure 9. Similar results were obtained for all three clones and longer induction times (up to 28 days, not shown). The right panel shows a Western blot from the WT parental strain treated with 10  $\mu\text{g}/\text{ml}$  oxytet for 48 h. Total cell extracts from  $6 \times 10^6$  cells were loaded per lane on an SDS-15% PAGE, and the immunoblot conditions adjusted to allow detection of endogenous *Tb1-C-Grx1* while avoiding saturation for TXN signal (e.g., guinea pig serum  $\alpha$ -*Tb1-C-Grx1*: 1/500, goat HRP-conjugated serum anti-guinea pig IgG: 1/5,000, and rabbit serum  $\alpha$ -TXN: 1/10,000). The star indicates a nonspecific reaction of the  $\alpha$ -*Tb1-C-Grx1* antibodies that has been previously reported (3). (F) Subcellular localization of C104S *Tb1-C-Grx1* in bloodstream parasites. The immunofluorescence images correspond to cells from clone 3 induced for 48 h with 10  $\mu\text{g}/\text{ml}$  oxytet (upper panel) or noninduced (lower panel) and prepared as described in the Materials and Methods section (main text). From left to right: (i) bright field, (ii)  $\alpha$ -guinea pig Alexa-Fluor<sup>488</sup> signal corresponding to samples incubated with purified guinea pig serum  $\alpha$ -*Tb1-C-Grx1* (green label), (iii) the mitochondrial marker Mitotracker<sup>®</sup> (Molecular Probes; red label), and (iv) merge image. The image shown in Figure 9B is highlighted with a white box. (G) In both panels, the upper and lower image strips show photographs from 48-h induced and noninduced (control) cultures. From left to right: (i) bright-field image, (ii) TOPRO staining of nucleic acids (blue), (iii)  $\alpha$ -guinea pig Alexa-Fluor<sup>488</sup> signal from samples incubated with purified guinea pig serum  $\alpha$ -*Tb1-C-Grx1* (upper panel; green label) or mouse monoclonal antibodies (clone 9E10)  $\alpha$ -C-myc (lower panel; green label), and (iv) merge images with scale bars. oxytet, oxytetracycline.

**E** C104S clone 3 / 10 days

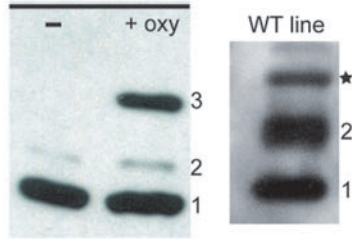

**F**

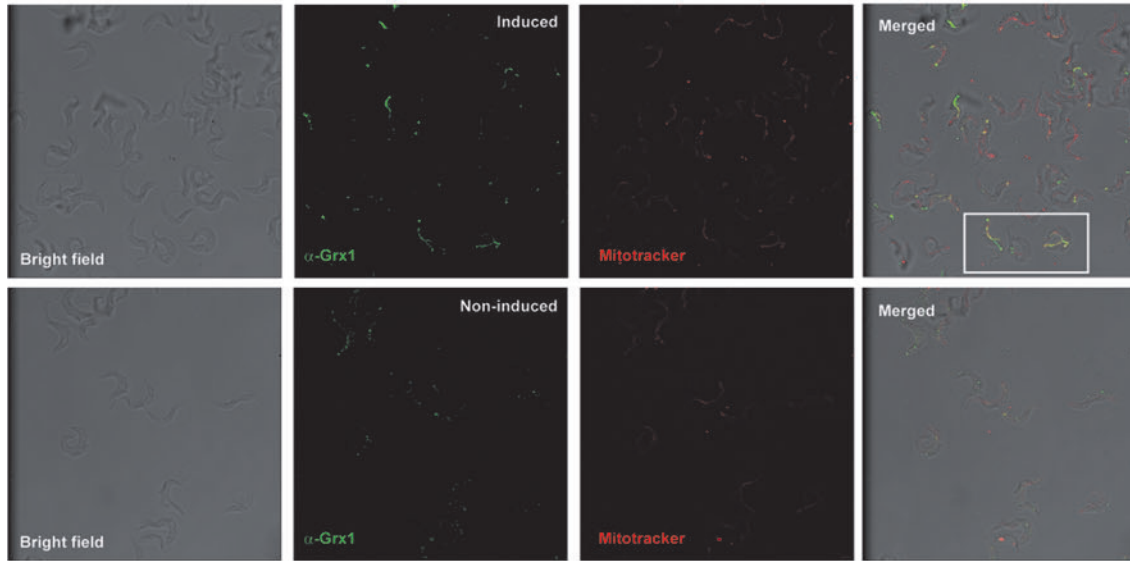

**G**

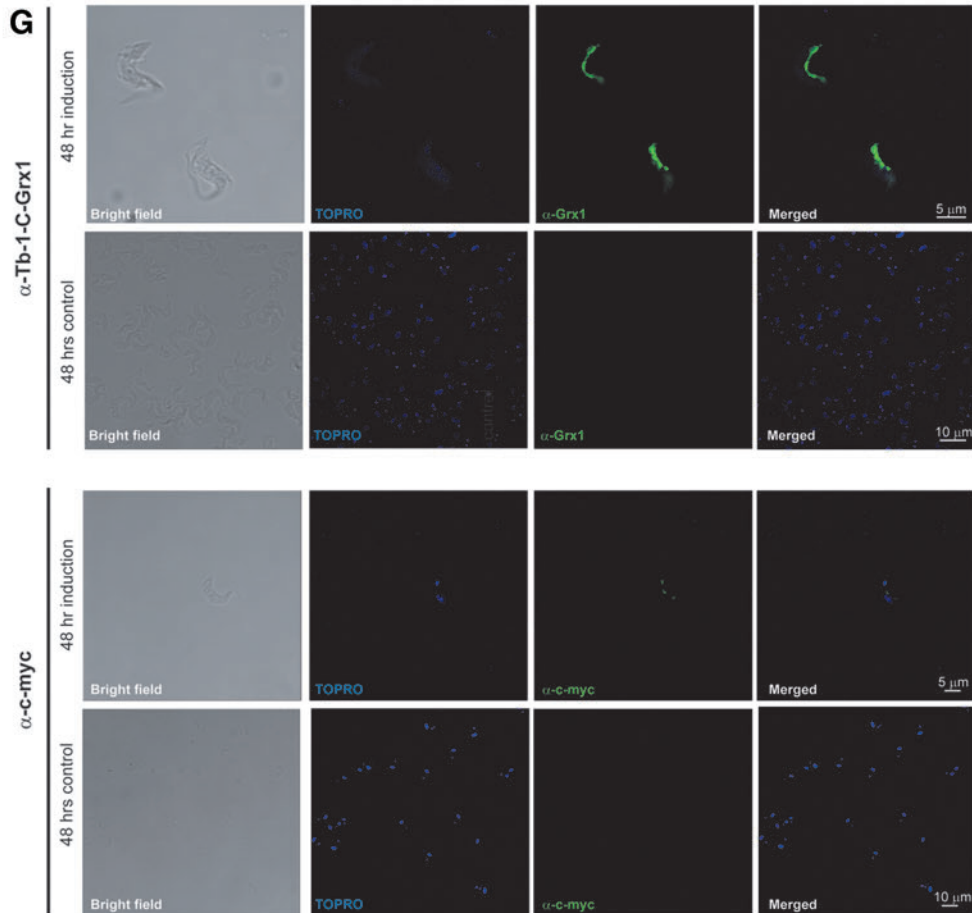

Supplement: Supp_Fig5.pdf [file Supp_Fig5.pdf]
