# Supplementary material
Source: PubMed Central journal article supplement (PMC3739951)
Supplement: Supp_Fig2.pdf [file Supp_Fig2.pdf]

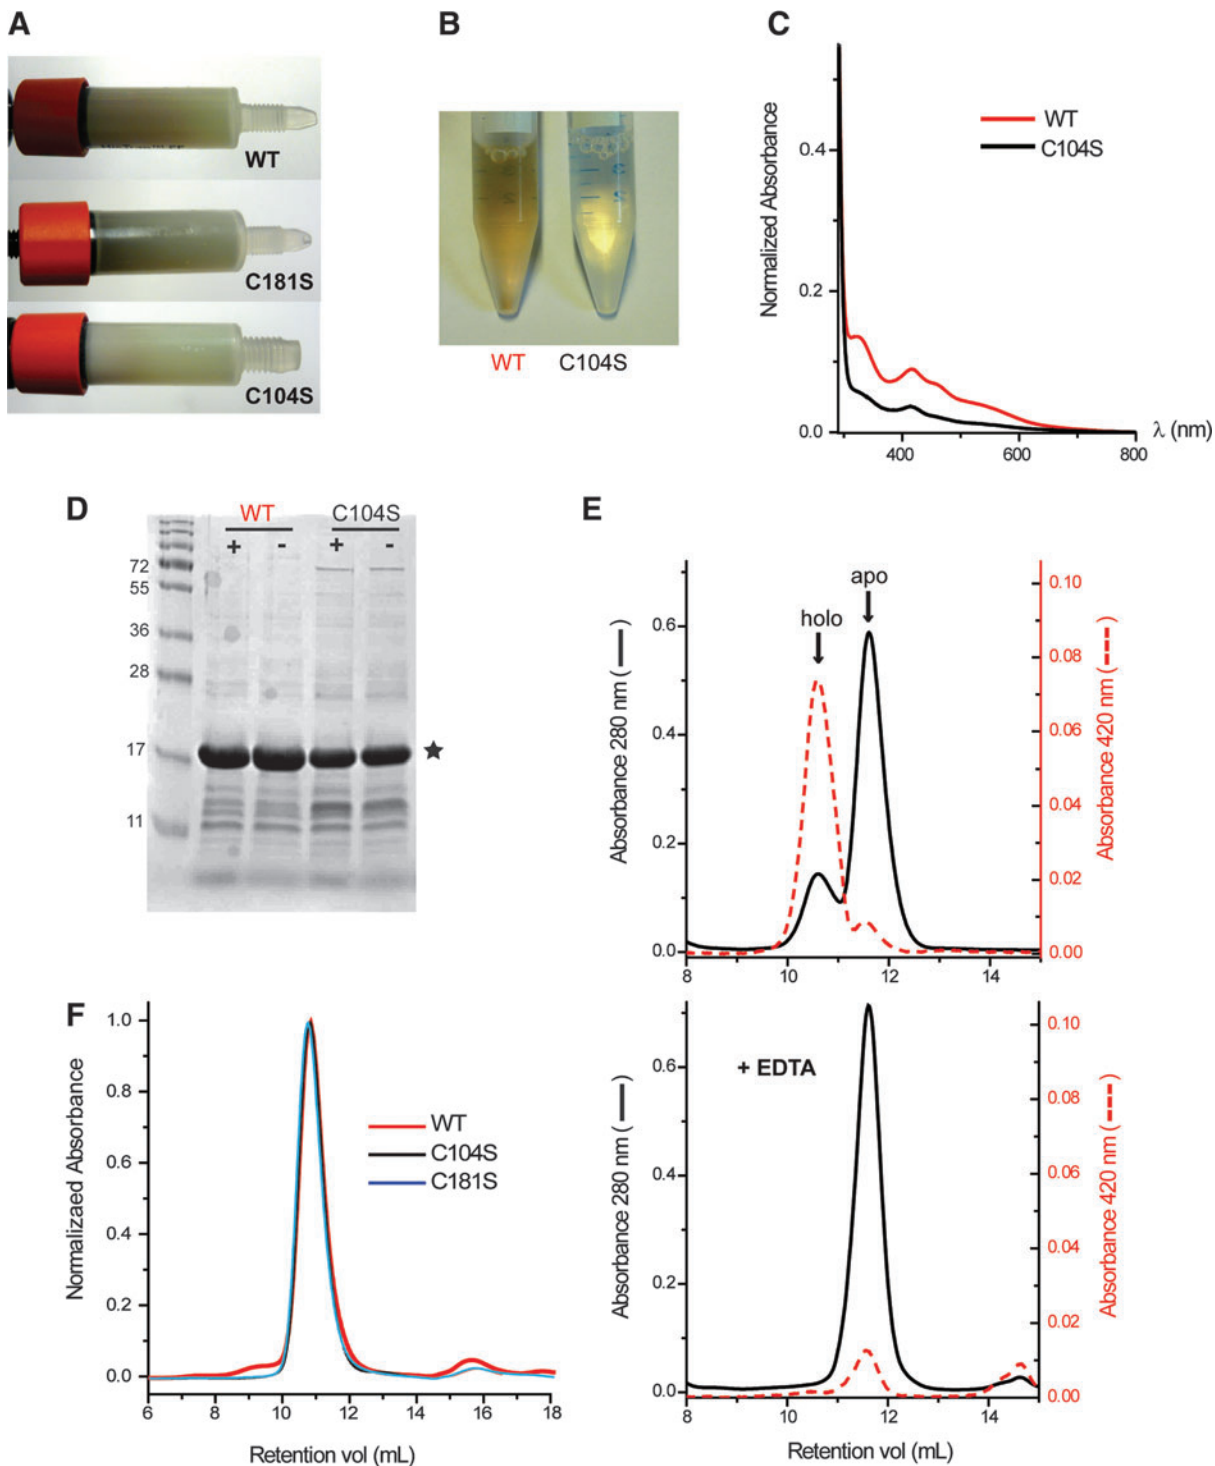

**SUPPLEMENTARY FIG. S2. ISC binding of different His-tagged *Tb1*-C-Grx1 species.** (A) Ni<sup>2+</sup>-affinity chromatography columns loaded with *E. coli* lysates containing recombinant WT, C181S, and C104S forms of *Tb1*-C-Grx1. (B) Samples of WT and C104S 1-C-Grx1 immediately after elution from Ni<sup>2+</sup>-affinity chromatography columns. (C) At equal protein concentrations, the UV-visible spectrum of the C104S mutant (black line) lacks the characteristic chromophore peaks at 320 and 420 nm present in the WT protein (red line). (D) Freshly prepared WT and C104S 1-C-Grx1 were subjected to SDS-PAGE under reducing (+) and nonreducing (-) conditions (20  $\mu$ g protein/lane). Both proteins displayed  $\geq 90\%$  purity and run at a mass expected for the His-tagged monomeric protein (17.630 kDa, star). Molecular weight standard bands (kDa) are shown on the left lane. (E) Freshly purified WT 1-C-Grx1 (see D), was subjected to SEC with online UV-visible detection at 280 nm (black solid line) and 420 nm (red dashed line) as described in the Materials and Methods section. A small fraction eluted before the main protein peak and presented absorption at 420 nm (upper chromatogram). This species disappeared when the protein sample was treated for 30 min with 5 mM EDTA before the chromatography (lower chromatogram). (F) SEC analysis of 500  $\mu$ g His-tagged WT (red line), C181S (blue line), and C104S (black line) 1-C-Grx1 treated with 5 mM DTT for 10 min before injection into the Superdex 75 10/300 GL column equilibrated with 50 mM sodium phosphate and 300 mM NaCl, pH 7.8. All the proteins presented identical retention volumes. SECs shown in panel E and F were performed in two different Superdex 75 10/300 GL columns calibrated independently. DTT, dithiotreitol; SEC, size-exclusion chromatography; SDS-PAGE, sodium dodecyl sulfate-polyacrylamide gel electrophoresis; WT, wild type.
