# Supplementary material
Source: PubMed Central journal article supplement (PMC3739951)
Supplement: Supp_Fig4.pdf [file Supp_Fig4.pdf]

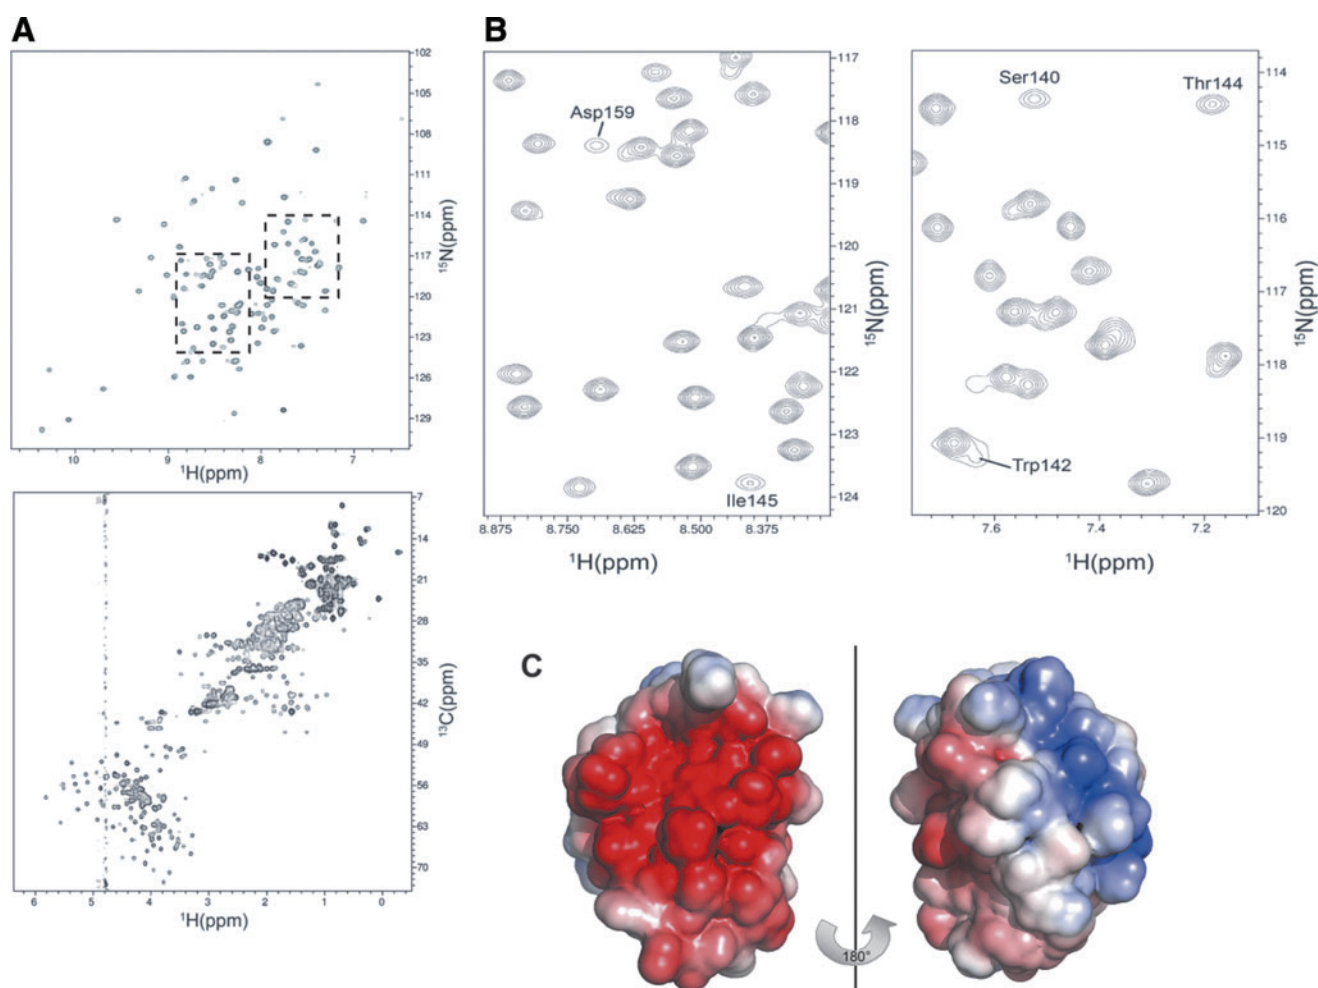

**SUPPLEMENTARY FIG. S4. HSQC spectra and electrostatic surfaces of  $\Delta 76$  Tb1-C-Grx1.** (A)  $^{15}\text{N}$ -HSQC (upper panel) and  $^{13}\text{C}$ -HSQC (lower panel) spectra of uniformly labeled  $^{15}\text{N}$   $^{13}\text{C}$   $\Delta 76$  Tb1-C-Grx1 recorded at 900 MHz. (B) Enlargement of the parts of  $^{15}\text{N}$ -HSQC, where residues showing significant line broadening are indicated. (C) The PDB2PQR server (5) was used to convert the protein file to the PQR format, and charges were assigned using the PARSE force field. The Adaptive Poisson-Boltzmann Solver plugin for Pymol was used to map the electrostatic potential ( $\pm 5$  kT/e) onto the molecular surface of the protein. Areas of negative and positive electrostatic potential are depicted in red and blue, respectively.
