# Supplementary material
Source: PubMed Central journal article supplement (PMC3739951)
Supplement: Supp_Table1.pdf [file Supp_Table1.pdf]

SUPPLEMENTARY TABLE S1. STRUCTURE STATISTICS  
OF THE ENERGY-MINIMIZED FAMILY OF CONFORMERS  
OF  $\Delta 76$  Tb1-C-Grx1

---

*NOE upper distance restraints*

---

|                                                |                 |
|------------------------------------------------|-----------------|
| Total                                          | 1909            |
| Intraresidue (i=j)                             | 553             |
| Sequential ( $ i-j =1$ )                       | 499             |
| Medium range ( $1 <  i-j  \leq 5$ )            | 325             |
| Long range ( $ i-j  > 5$ )                     | 532             |
| TALOS-derived dihedral restraints              | 191             |
| Residual NOE violations <sup>a</sup>           |                 |
| Number $\geq 0.2$ Å                            | $1.2 \pm 1.0$   |
| Maximum (Å)                                    | $0.22 \pm 0.20$ |
| Deviation from idealized geometry <sup>a</sup> |                 |
| Bond lengths (Å)                               | 0.014           |
| Bond angles (°)                                | 1.9             |
| Ensemble rmsd <sup>b</sup> (Å)                 |                 |
| Backbone (78–182)                              | $0.54 \pm 0.12$ |
| All heavy atoms                                | $1.07 \pm 0.09$ |
| Ramachandran plot statistics (%) <sup>c</sup>  |                 |
| Most favored regions                           | 90.7            |
| Additionally allowed regions                   | 8.8             |
| Generously allowed regions                     | 0.4             |
| Disallowed regions                             | 0.2             |

---

<sup>a</sup>The average values for the 20 energy-minimized structures with the lowest CYANA-target function values and the standard deviation among them are reported.

<sup>b</sup>rmsd values were calculated with MOLMOL.

<sup>c</sup>Determined by Procheck.
