# Supplementary material
Source: PubMed Central journal article supplement (PMC3739951)
Supplement: Supp_Table2.pdf [file Supp_Table2.pdf]

SUPPLEMENTARY TABLE S2. OLIGONUCLEOTIDES USED IN THIS WORK

| <i>Primer</i> | <i>Sequence 5' to 3'</i>                     | <i>Application</i>                                                                                                                             |
|---------------|----------------------------------------------|------------------------------------------------------------------------------------------------------------------------------------------------|
| A             | CCATGGGACAAAGCACCTCC                         | Forward primer for amplification and cloning of <i>Tb1-C-Grx1</i> WT in pET-trx1b vector, starting with Gln42.                                 |
| B             | TTCCATGGTTAAGAAAGACATCGACG                   | Forward primer for amplification and cloning of <i>Tb1-C-Grx1</i> $\Delta 76$ in pET-trx1b vector, starting with Met77.                        |
| C             | TGAATTCGGATCCGGTACCTTAC                      | Reverse primer for amplification and cloning of <i>Tb1-C-Grx1</i> WT and $\Delta 76$ in pET-trx1b vector.                                      |
| D             | CCGAGGCCCCCATGTCTGCCTATTCGAAG                | Reverse primer for mutation of Cys104 to Ser using the primer extension method.                                                                |
| E             | TAGGTACCTTACAGGTCCCGAGAAGTGATT<br>CCCTTATCCC | Reverse primer for mutation of Cys181 to Ser                                                                                                   |
| F             | CCGAGGCCCCCATGTCTGGCCTATTCGAAGCG             | Forward primer used to generate Cys104 to Ser mutant in the trypanosomal vector pHD1700-1-C-Grx1 cMyc2 (3) using a commercial mutagenesis kit. |
| G             | CGCTTCGAATAGGCCGACATGGGGCCTCGG               | Forward primer used to generate Cys104 to Ser mutant in the trypanosomal vector pHD1700-1-C-Grx1 cMyc2 (3) using a commercial mutagenesis kit. |

WT, wild type.
